# Supplementary material for: High electrocatalytic performance of platinum and manganese dioxide nanoparticle decorated reduced graphene oxide sheets for methanol electro-oxidation
Source: Royal Society of Chemistry journal article supplement (doi:10.1039/c4ra05507a), 2014-01-01
Supplement: c4ra05507a1.pdf [file c4ra05507a1.pdf]

## Supporting material

### Highly electrocatalytic performance of platinum and manganese dioxide nanoparticles decorated reduced graphene oxide sheets for methanol electro-oxidation

**A.T. Ezhil Vilian<sup>a</sup>, Muniyandi Rajkumar<sup>b</sup>, Shen-Ming Chen<sup>a\*</sup> Chi-Chang Hu<sup>b</sup>,**

**Karunakara Moorthy Boopathi<sup>c,d</sup>, and Chih-Wei Chu<sup>c,d</sup>,**

<sup>a</sup>Department of Chemical Engineering and Biotechnology, National Taipei University of Technology, No.1, Section 3, Chung-Hsiao East Road, Taipei 106, Taiwan (R.O.C).

<sup>b</sup>Laboratory of Electrochemistry & Advanced Materials, Department of Chemical Engineering, National Tsing Hua University, Hsinchu 30013, Taiwan (R.O.C).

<sup>c</sup>Nanoscience and Technology Program, Taiwan International Graduate Program, Academia Sinica, Taipei 115, Taiwan(R.O.C).

<sup>d</sup>Research Center for Applied Science, Academia Sinica, Taipei115, Taiwan(R.O.C).

\*Corresponding author. Fax: +886 2270 25238; Tel: +886 2270 17147,

E-mail: smchen78@ms15.hinet.net

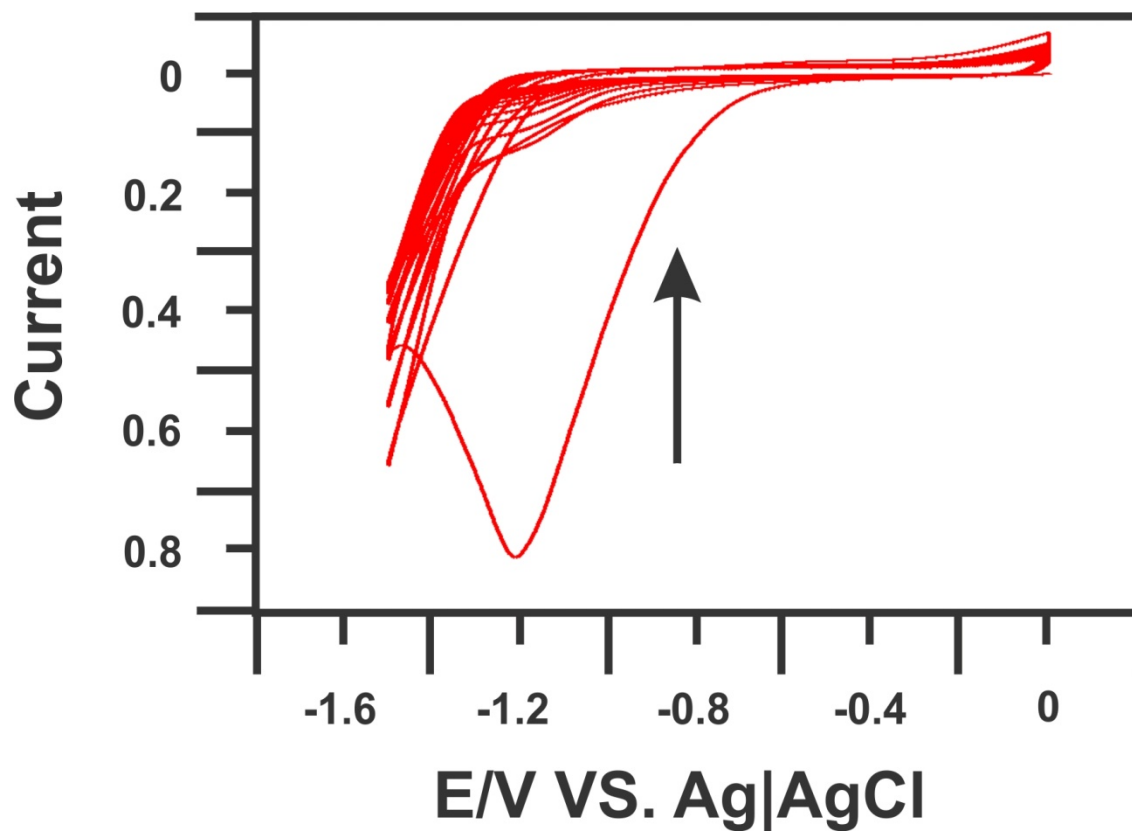

**Fig S1.** Electrochemical reduction of GO for 30 cycles in PBS (pH 5) Scan rate = 50 mV s<sup>-1</sup>.

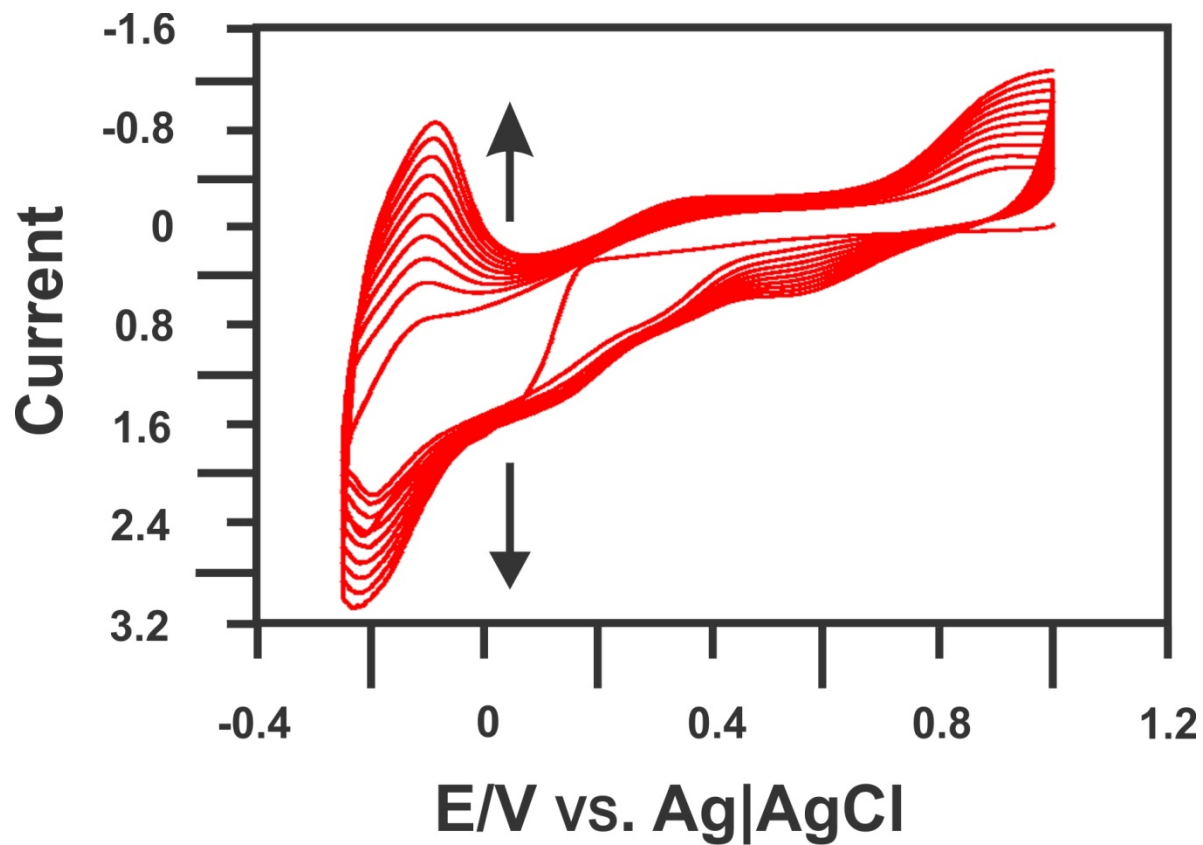

**Fig S2.** Repeated cyclic voltammogram of nano Pt film electrodeposited on GCE from 0.5 M  $\text{H}_2\text{SO}_4$  containing 1 mM of  $\text{K}_2\text{PtCl}_6$  and potential scan between -0.25 to 1.0 V for 10 cycles (Scan rate of  $0.05 \text{ V s}^{-1}$ ).

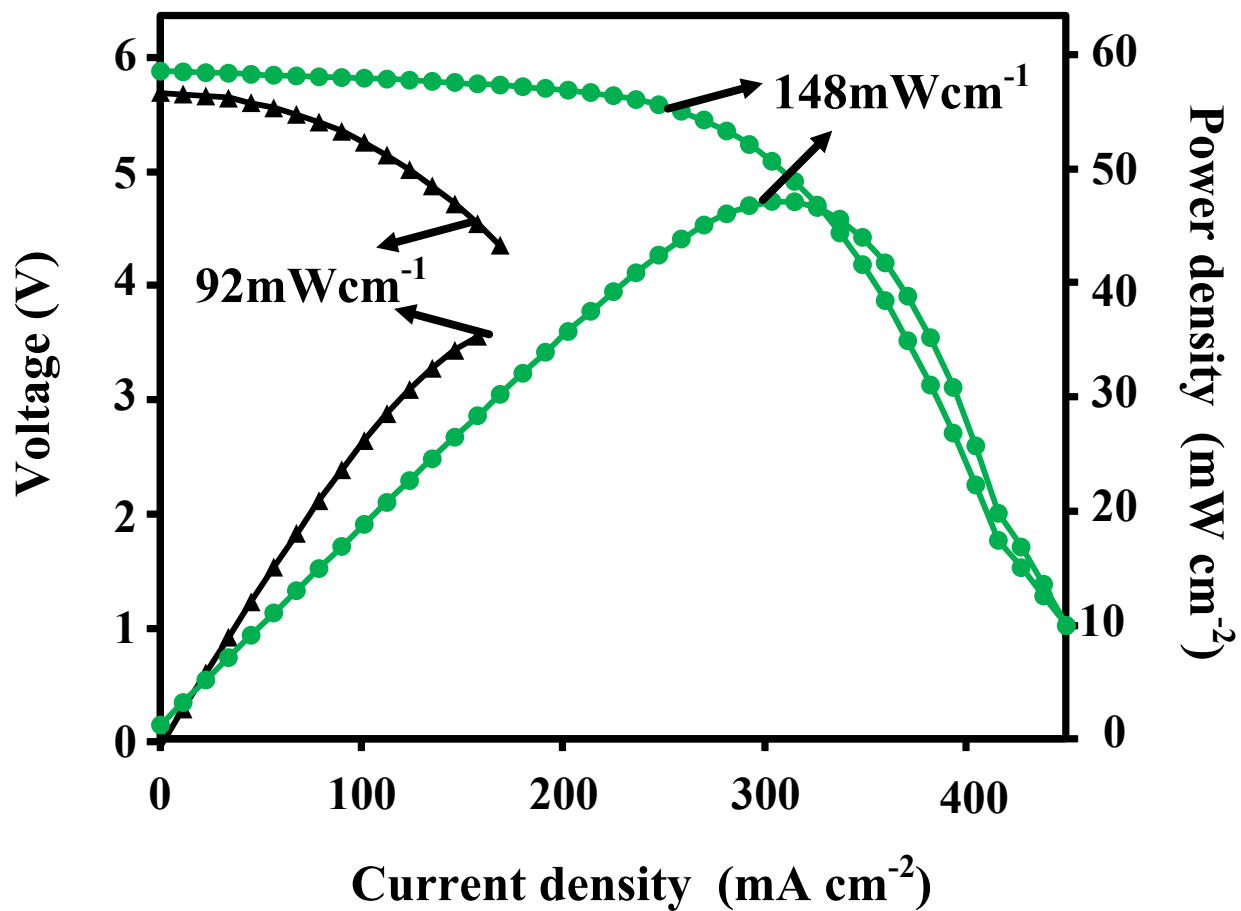

**Fig S3.** Cell polarization and power density curves obtained using Pt/MnO<sub>2</sub>/ERGO modified electrodes as a anode and an Pt/C black catalyzed cathode in electrolyte 0.1 M H<sub>2</sub>SO<sub>4</sub> + 1M CH<sub>3</sub>OH aqueous solutions; Nafion 112; cell temperature 30°C.
